# Supplementary material
Source: PubMed Central journal article supplement (PMC2605908)

**A**

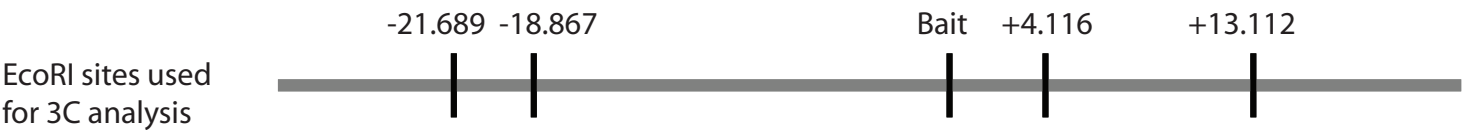

**B**

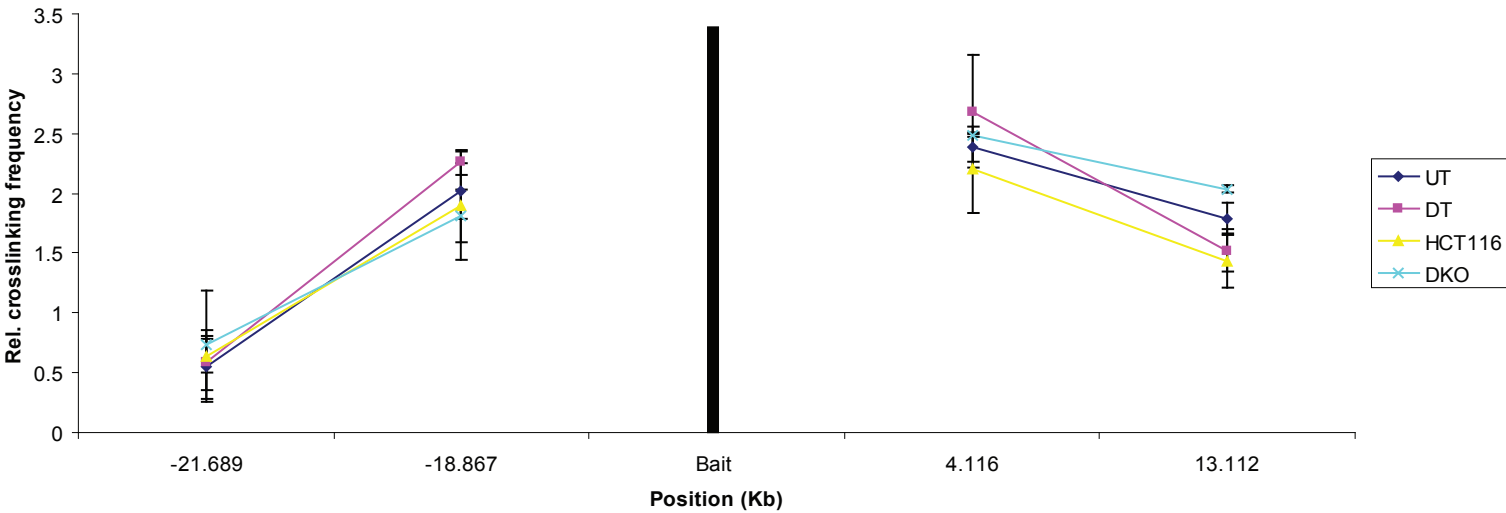

**C**

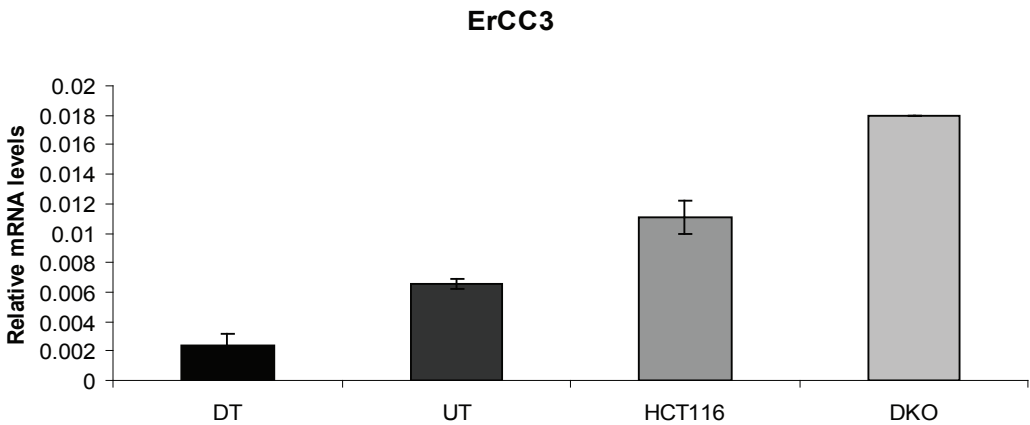

Supplement: pbio.0060306.sg002.pdf [file pbio.0060306.sg002.pdf]

A.

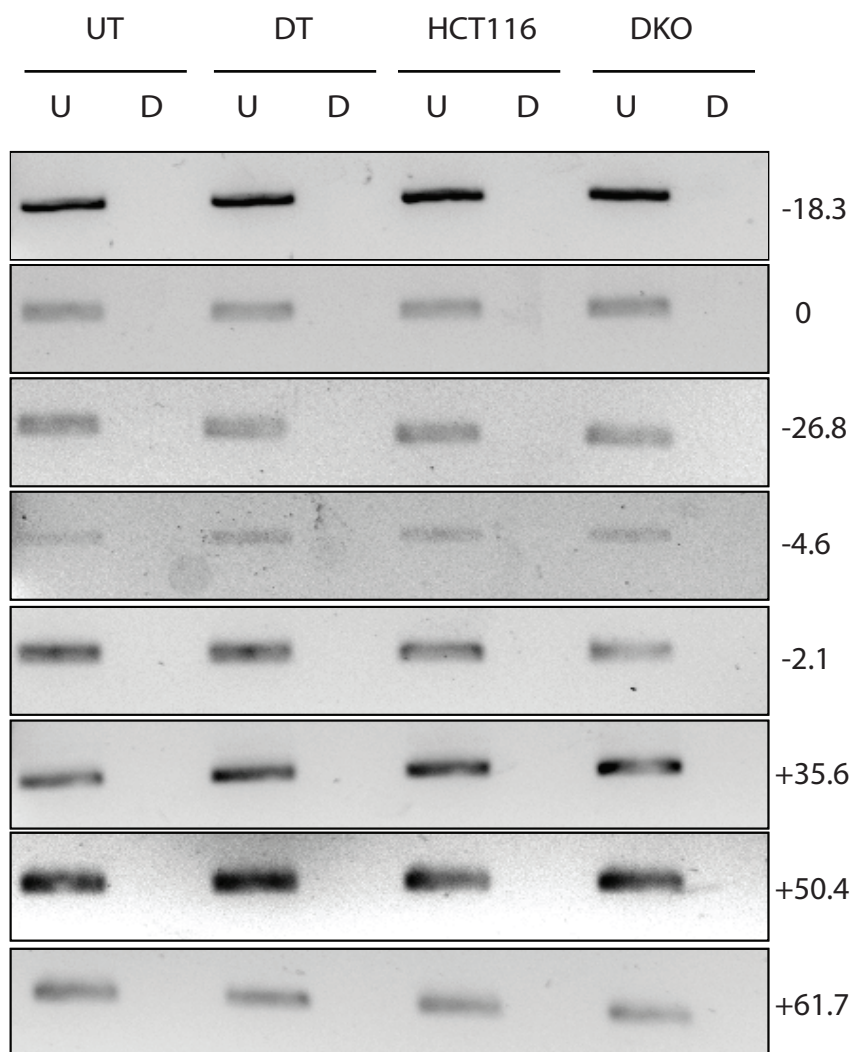

B.

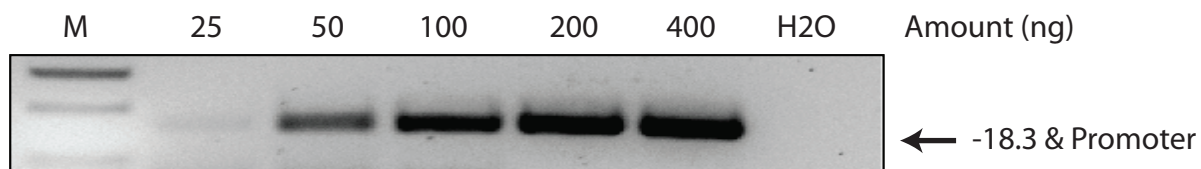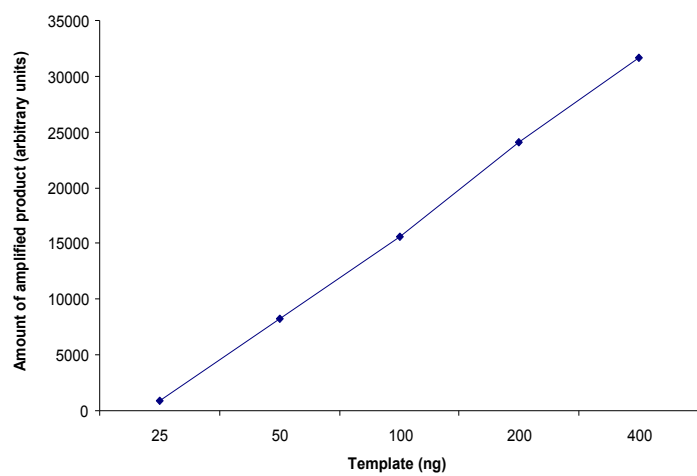

C.

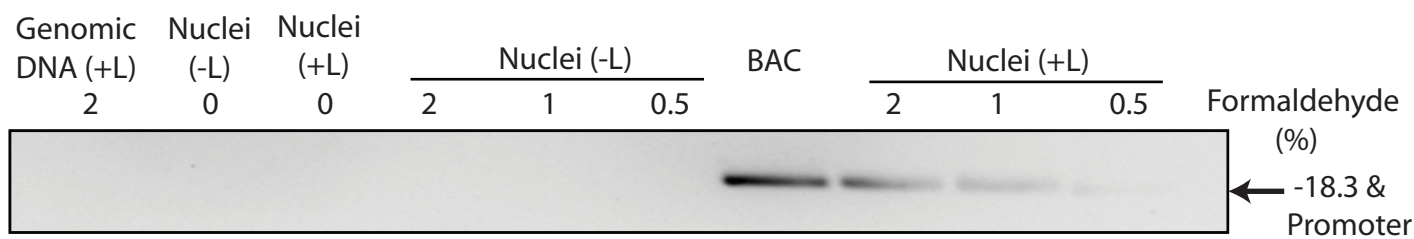

Supplement: pbio.0060306.sg003.pdf [file pbio.0060306.sg003.pdf]

### H3K27Me3

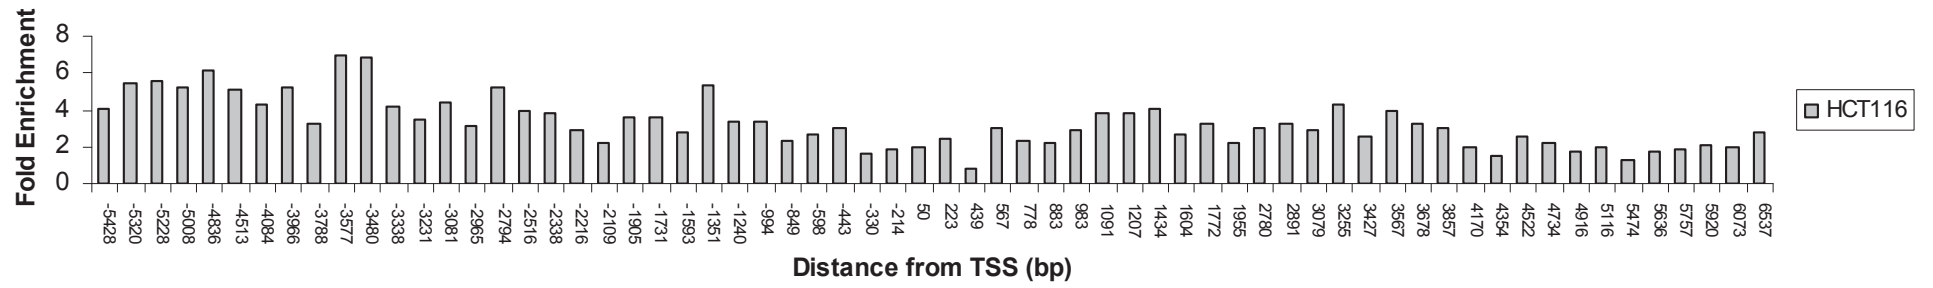

Supplement: pbio.0060306.sg004.pdf [file pbio.0060306.sg004.pdf]

**A.**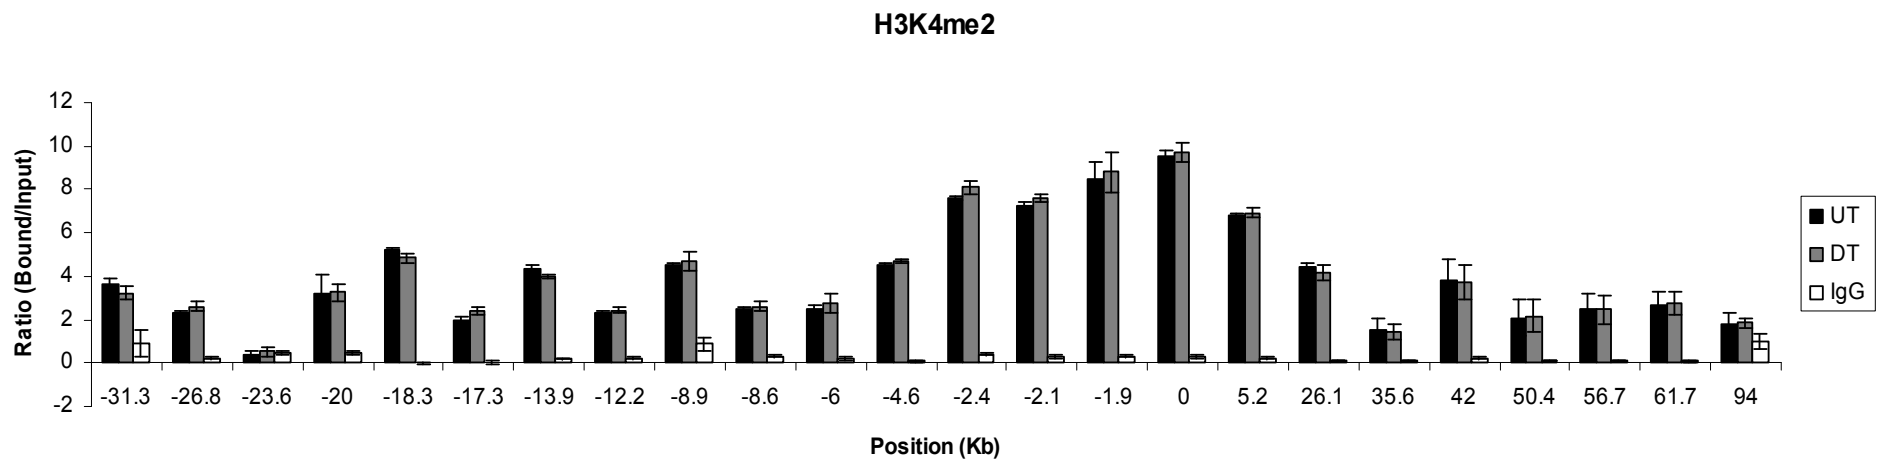**B.**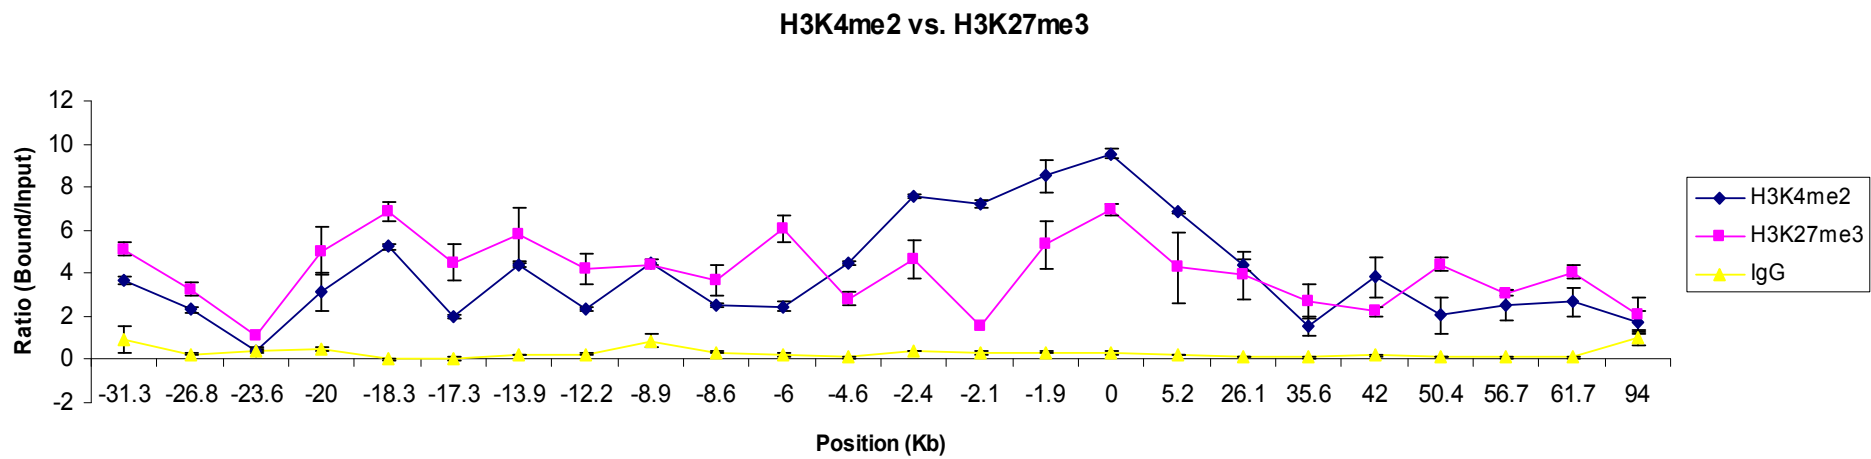

Supplement: pbio.0060306.sg005.pdf [file pbio.0060306.sg005.pdf]

**EZH2**

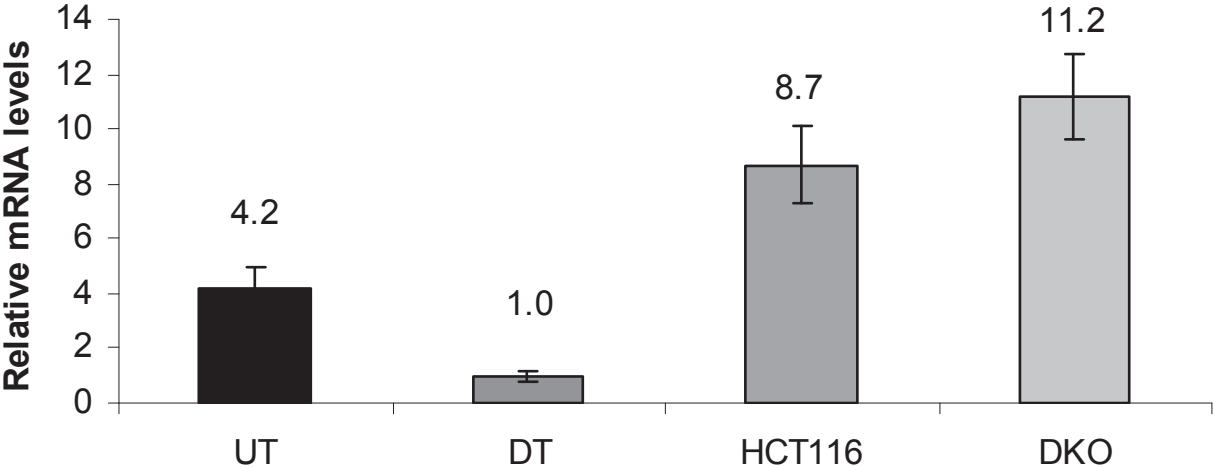

Supplement: pbio.0060306.sg006.pdf [file pbio.0060306.sg006.pdf]

**A****EZH2**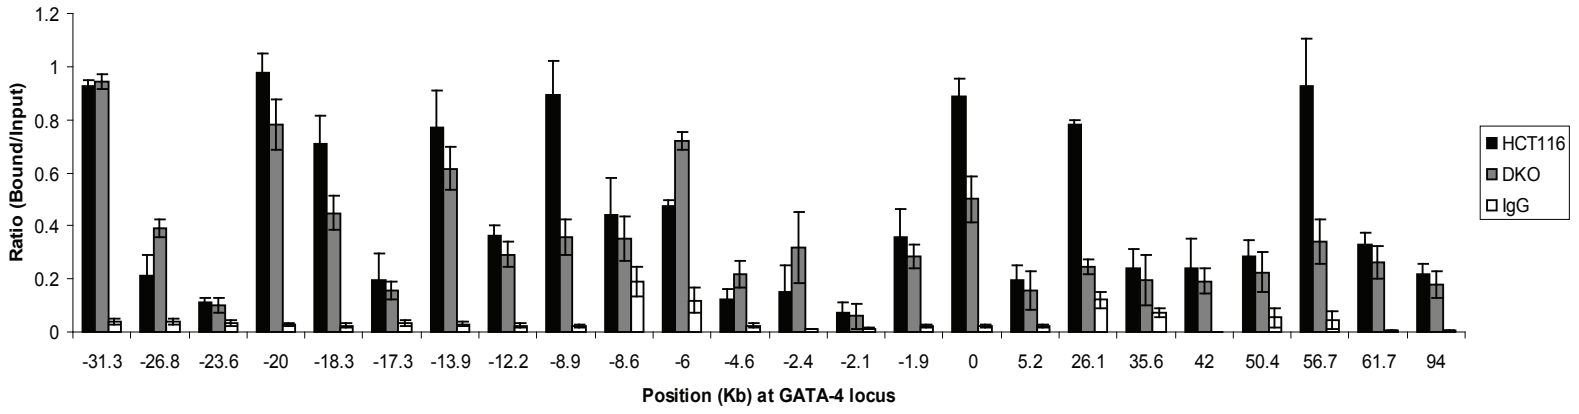**H3K27me3**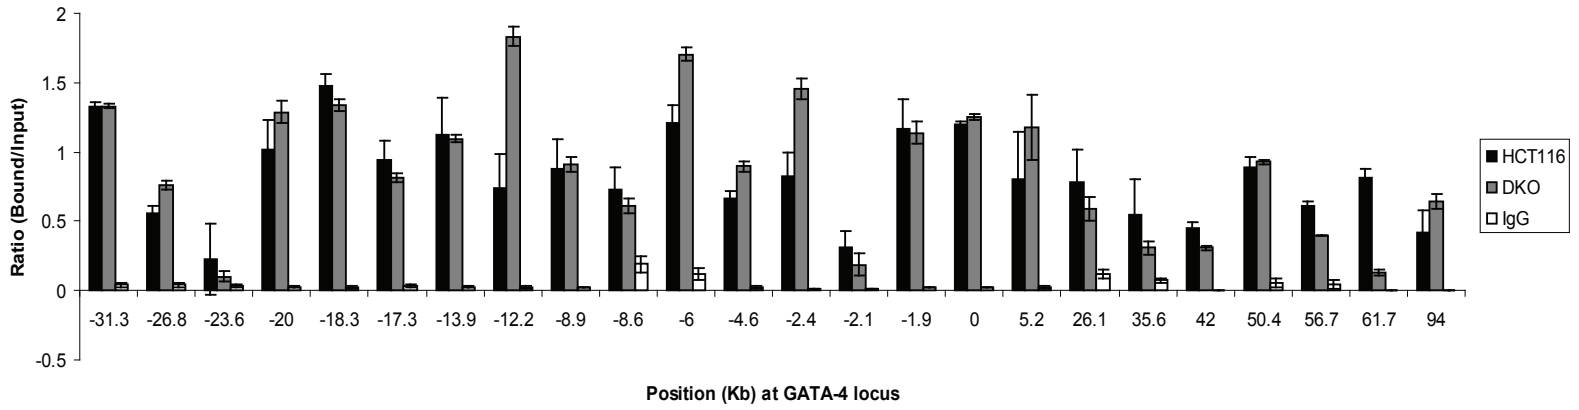**B****EZH2**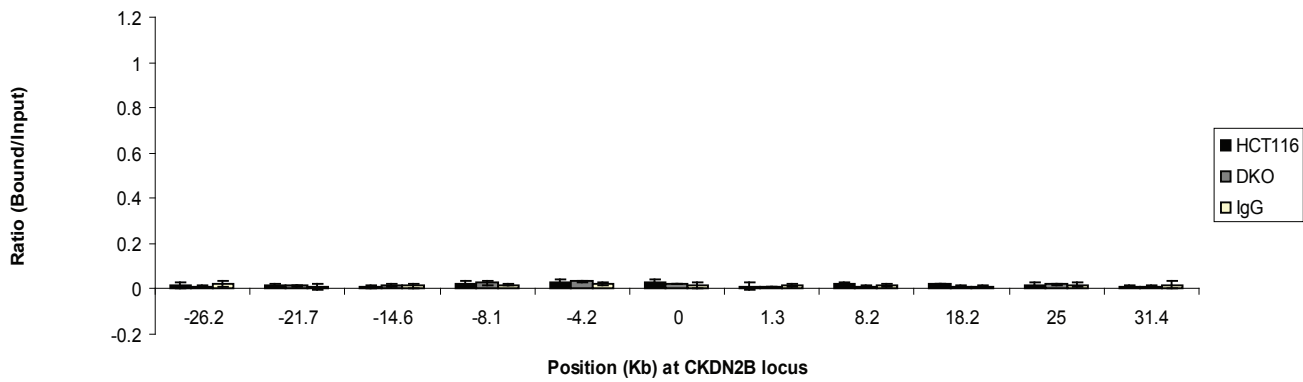**H3K27me3**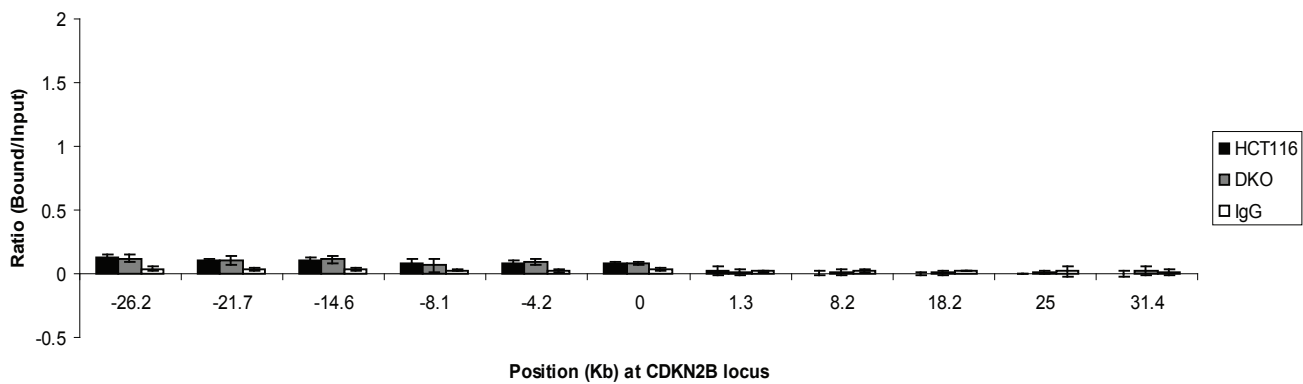

Supplement: pbio.0060306.sg007.pdf [file pbio.0060306.sg007.pdf]

### MBD2

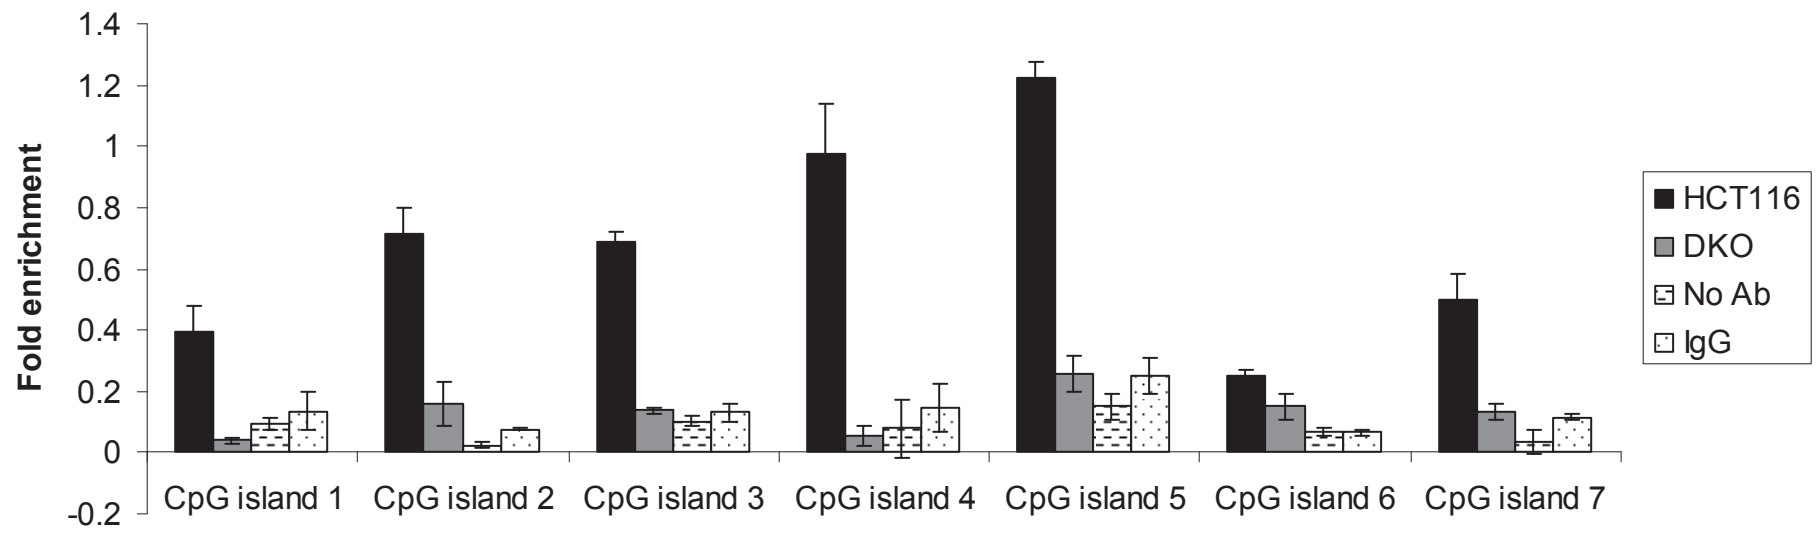

Supplement: pbio.0060306.sg008.pdf [file pbio.0060306.sg008.pdf]

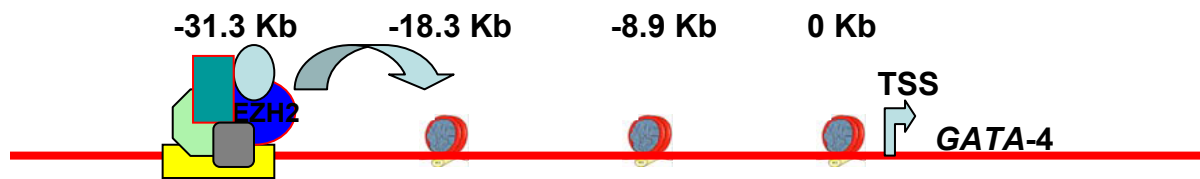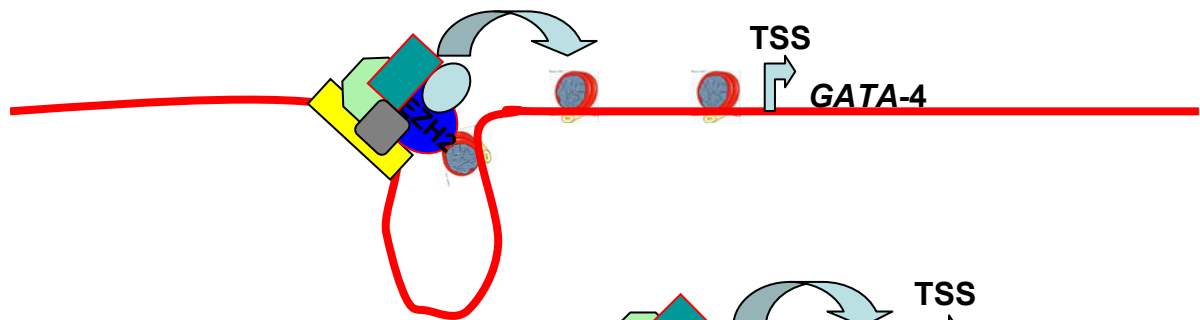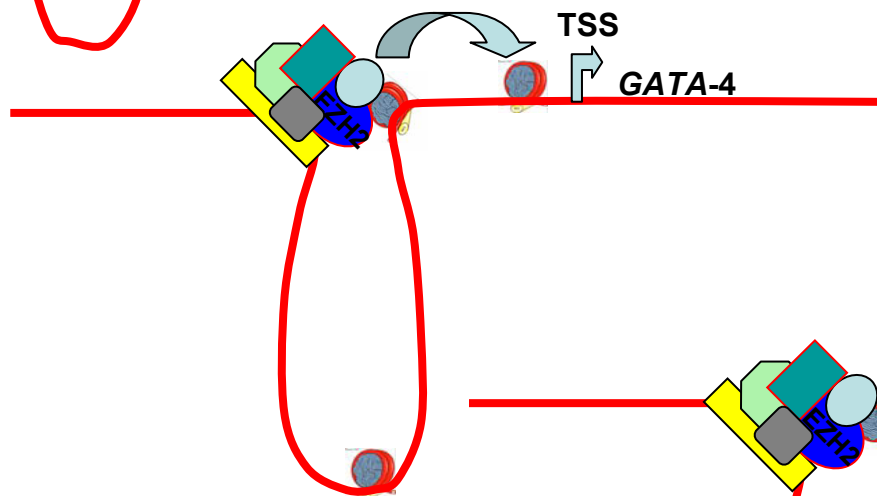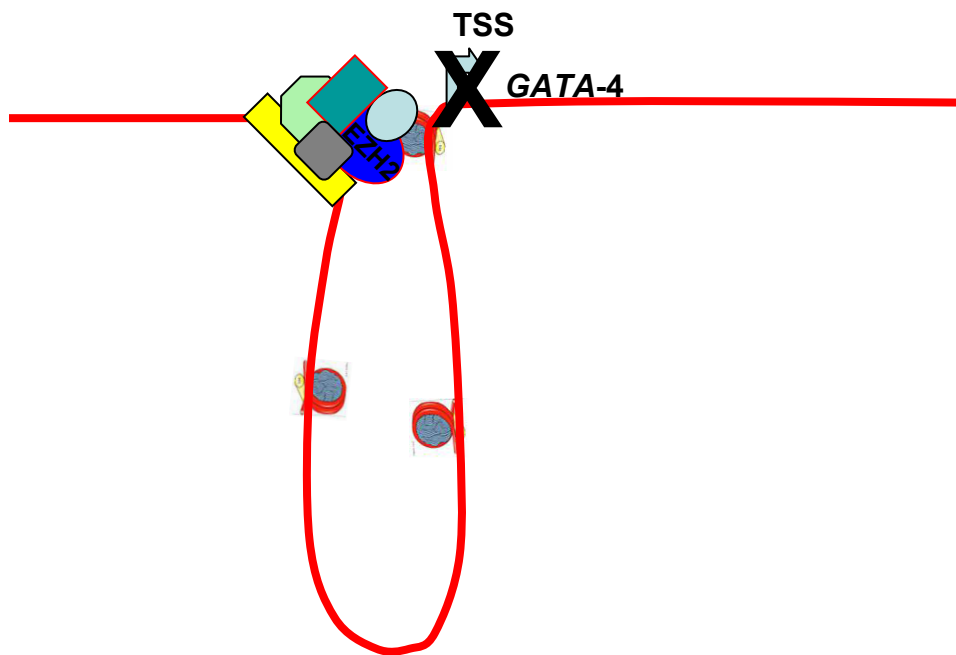

Supplement: pbio.0060306.sg009.pdf [file pbio.0060306.sg009.pdf]
